# Supplementary material for: Flexible and stretchable metal oxide nanofiber networks for multimodal and monolithically integrated wearable electronics
Source: PubMed Central journal article supplement (PMC7229221; doi:10.1038/s41467-020-16268-8), 2020-05-15
Supplement: 41467_2020_16268_MOESM3_ESM.pdf [file 41467_2020_16268_MOESM3_ESM.pdf]

## **Description of Additional Supplementary Files**

Supplementary Movie 1: Fabrication of metal-oxide fibers by using blow-spinning method

Supplementary Movie 2: Current change of wearable ITO FN/SBES device upon bending.
